# Supplementary material for: Transiently elevated expression of different forms of brain-derived neurotrophic factor in the neonatal medial prefrontal cortex affected anxiety and depressive-like behaviors in adolescence
Source: PubMed Central journal article supplement (PMC11608019; doi:10.7717/peerj.18465), 2024-11-27
Supplement: peerj-12-18465-s009.pdf [file peerj-12-18465-s009.pdf]

Transiently elevated expression of different forms 1  
of Brain-derived Neurotrophic Factor in the 2  
Neonatal Medial Prefrontal Cortex affected 3  
Anxiety and Depressive-like behaviors in 4  
Adolescence 5

Dmitriy Lanshakov, Elizaveta Shaburova, Ekaterina Sukhareva, Veta Bulygina,  
Uliana Drozd, Irina Larionova, Tatiana Gerashchenko,  
Tatiana Shnaider, Evgeny Denisov and Tatyana Kalinina

**Supplementary materials** 7

Table 1: Primers used in the study, name and sequence

| Name           | Sequence 5'-3'                                                     |
|----------------|--------------------------------------------------------------------|
| BDNF_F         | CAT ATC GGC CAC CAA AGA CTC G                                      |
| BDNF_R         | CAA CGG CAA CAA ACC ACA AC                                         |
| AsuNHproBDNF_F | TGA CGC TAG CAG ATC TAT GAC CAT CCT<br>TTT CCT TAC                 |
| AsuNH_BDNF_F   | TGA CGC TAG CAG ATC TAT GCA CTC CGA<br>CCC CG                      |
| BDNFmut_F      | CGC AAA CAT GTC TAT GGC TGC CGC AGC<br>GCA CTC CGA CCC CG          |
| BDNFmut_R      | CGG GGT CGG AGT GCG CTG CGG CAG<br>CCA TAG ACA TGT TTG CG          |
| SalBDNF_R      | TAG ATG GCG CGC CGT CGA CGC GGC<br>CGC CTA TCT TCC CCT TTT AAT GGT |

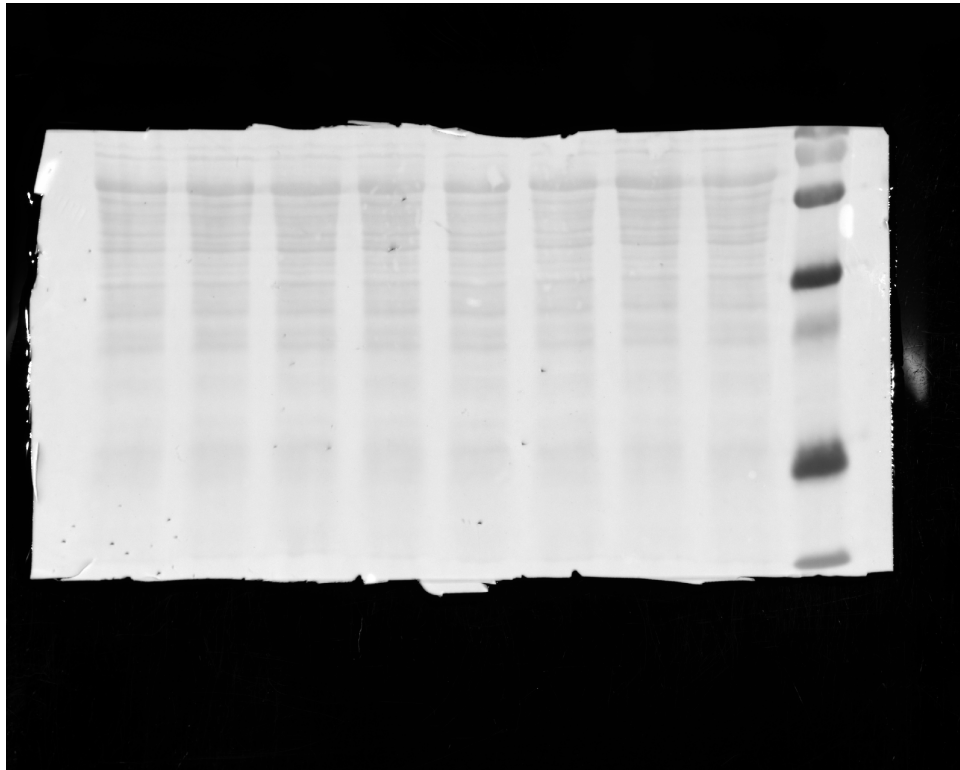

Figure 1: Membrane ponceau staining, protein ladder - PageRuler Plus Prestained Protein Ladder 10 to 250 kDa (26619, Thermo)

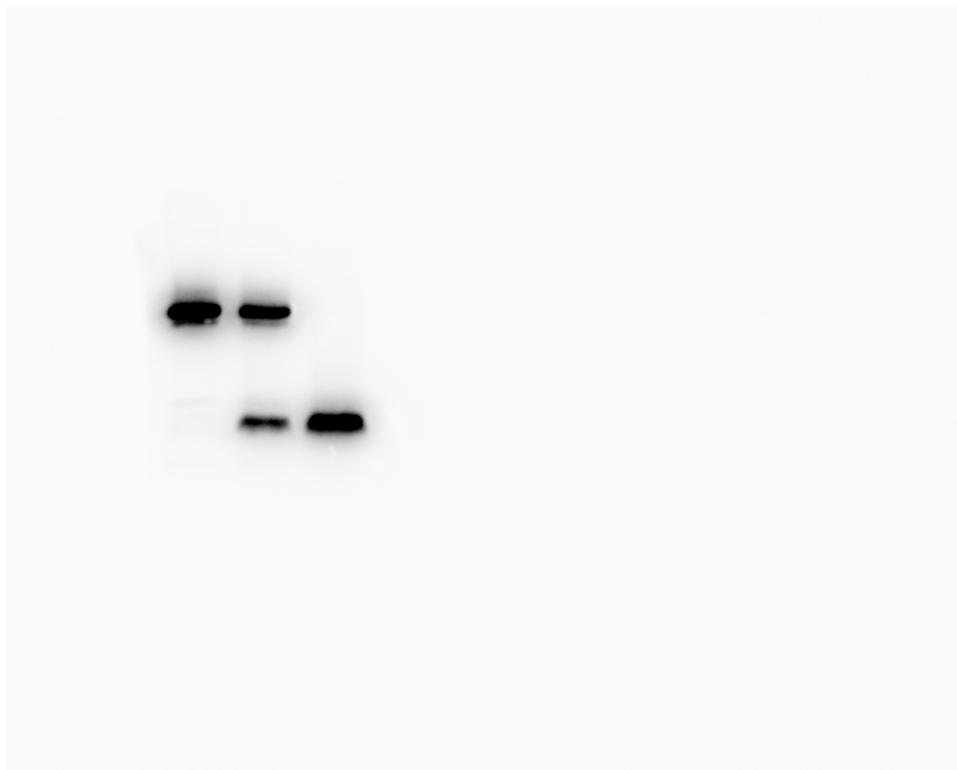

Figure 2: HA-tag immunoblot original image, SAB4300603 Sigma-Aldrich

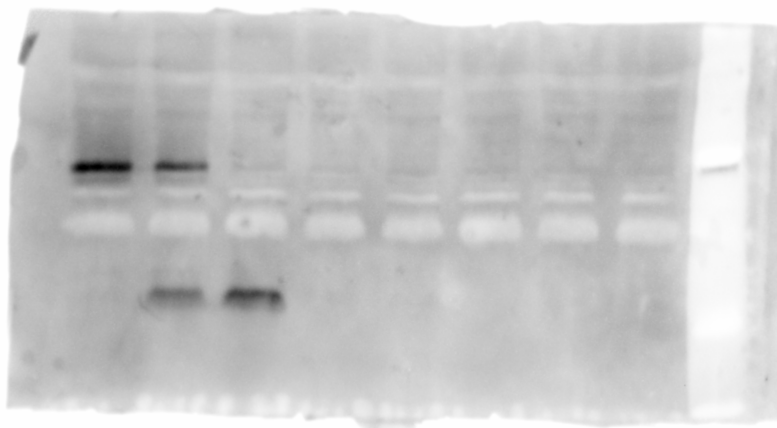

Figure 3: BDNF immunoblot original image, ab6201 Abcam

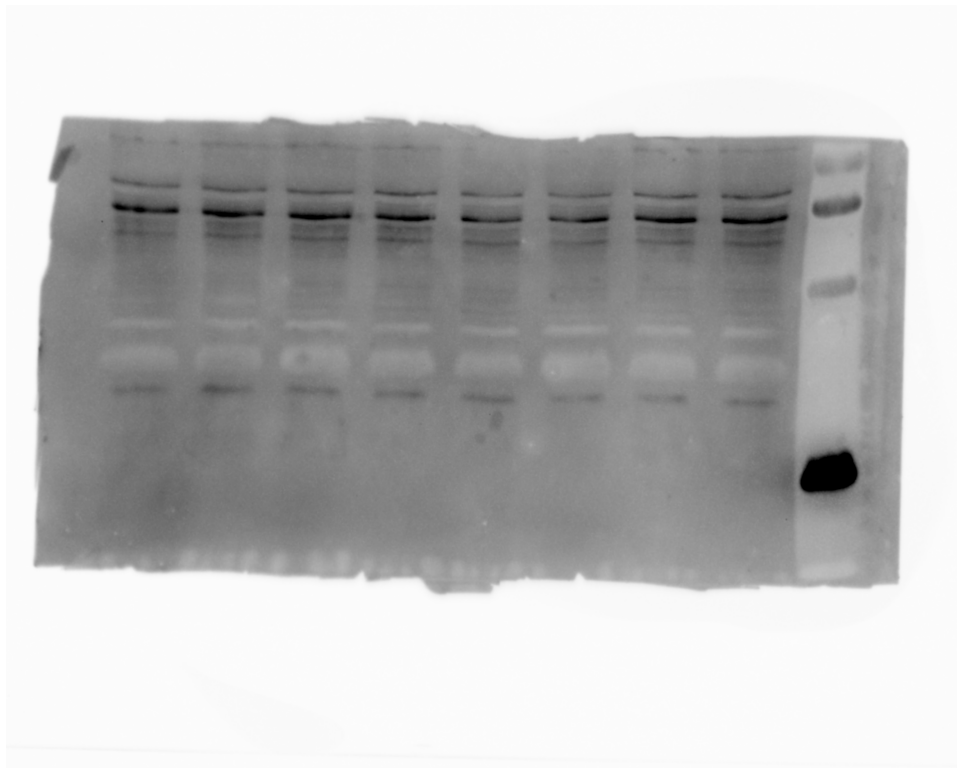

Figure 4: VP16 immunoblot original image, ab4808 Abcam

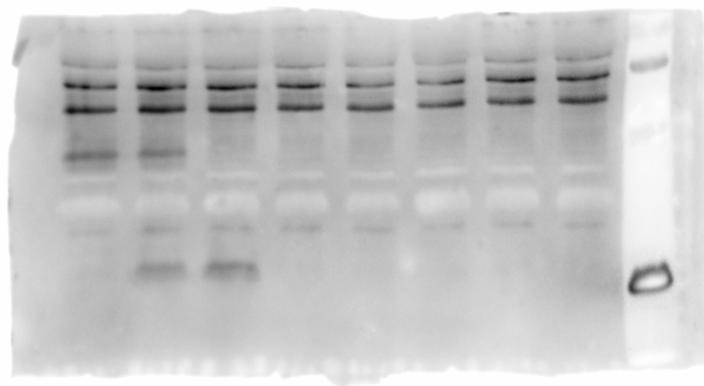

Figure 5: Actin immunoblot on the same membrane without stripping, ab179467 Abcam
